# Supplementary material for: Mixing and demixing of binary mixtures of polar chiral active particles
Source: Royal Society of Chemistry journal article supplement (doi:10.1039/c8sm00444g), 2018-01-01
Supplement: c8sm00444g1.pdf [file c8sm00444g1.pdf]

**Electronic Supplementary Information:**  
**Mixing and demixing of binary mixtures of polar chiral active  
particles**

Bao-quan Ai<sup>1,\*</sup>, Zhi-gang Shao<sup>1,†</sup> and Wei-rong Zhong<sup>2,‡</sup>

<sup>1</sup>*Guangdong Provincial Key Laboratory of Quantum Engineering and Quantum Materials,  
School of Physics and Telecommunication Engineering,  
South China Normal University, Guangzhou 510006, China. and*

<sup>2</sup>*Siyuan Laboratory, Guangzhou Key Laboratory of  
Vacuum Coating Technologies and New Energy Materials,  
Department of Physics, Jinan University, Guangzhou 510632, China.*

---

\* Email: aibq@scnu.edu.cn

† Email: zgshao@scnu.edu.cn

‡ Email: wrzhong@jnu.edu.cn

### Supporting Movie

**Movie 1.** Evolution of the mixture of the clockwise (blue) and counterclockwise (red) particles at  $g = 0.0$  and  $\omega = 0.5$ . The other parameters are  $\rho = 0.50$ ,  $v_0 = 1.0$ , and  $D_r = 0.001$ .

**Movie 2.** Evolution of the mixture of the clockwise (blue) and counterclockwise (red) particles at  $g = 0.1$  and  $\omega = 0.5$ . The other parameters are  $\rho = 0.50$ ,  $v_0 = 1.0$ , and  $D_r = 0.001$ .

**Movie 3.** Evolution of the mixture of the clockwise (blue) and counterclockwise (red) particles at  $g = 0.3$  and  $\omega = 0.5$ . The other parameters are  $\rho = 0.50$ ,  $v_0 = 1.0$ , and  $D_r = 0.001$ .

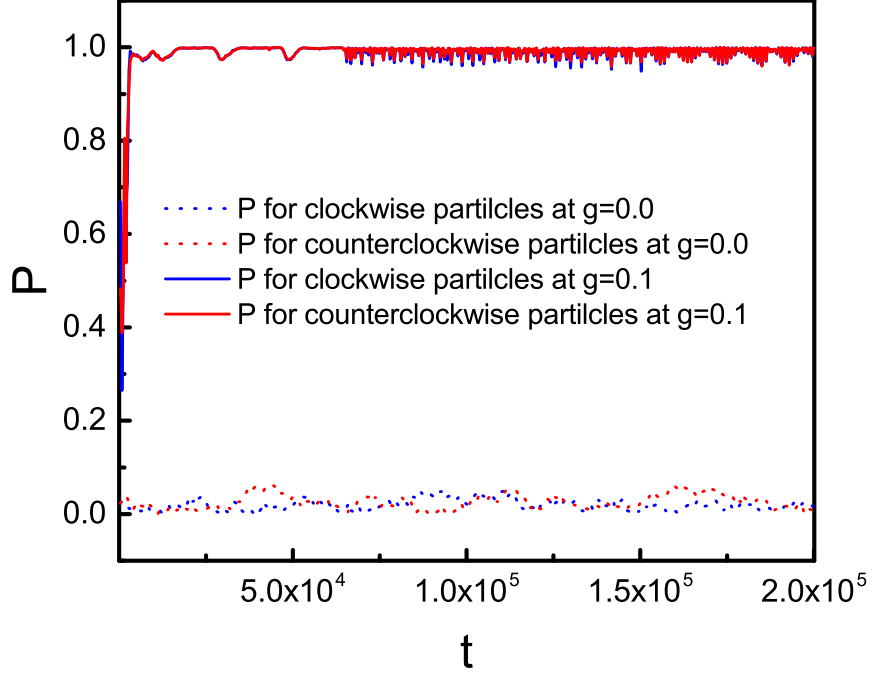

**Figure S1.** Polar order parameter of each particle specie as a function of  $t$  for different values of  $g$  at  $\rho = 0.50$ ,  $v_0 = 1.0$ ,  $D_r = 0.001$ , and  $\omega = 0.5$ . When the integration time increases from  $10^5$ , the polar order parameter of each particle specie changes very little (does not drift), which shows that the total integration time is sufficient to ensure that the density profile of the system has reached steady state. Note that though the polar order parameter of each particle specie tends to 1 at  $g = 0.1$ , the average polar order parameter for two particles species is about 0.6 (shown in the manuscript).

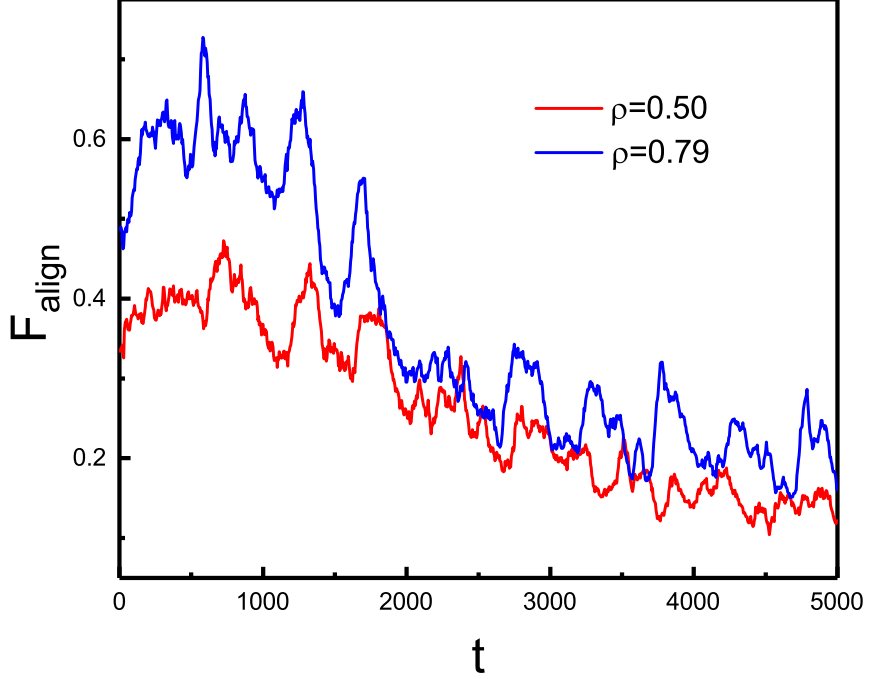

**Figure S2.** Average alignment interaction magnitude  $F_{align}$  as a function of  $t$  for different values of  $\rho$  at  $g = 0.1$ ,  $v_0 = 1.0$ ,  $D_r = 0.001$ , and  $\omega = 0.5$ . In order to investigate the role of the alignment interactions on the particle configuration, we define the average alignment interaction magnitude  $F_{align} = \frac{1}{N} \sum_{i=1}^N \left| \frac{g}{\pi R^2} \sum_{j \in \partial_i} \sin(\theta_j - \theta_i) \right|$ . When  $t < 2000$ , the average alignment interaction magnitude at  $\rho = 0.79$  is greater than that at  $\rho = 0.50$ , which shows that the role of the polar alignment is more pronounced for the large packing fraction. On increasing  $t$  from 2000,  $F_{align}$  is significantly reduced. This can be explained as follows. In the initial stage, the orientation  $\theta$  is random, the polar alignment dominates the dynamics of the system. When the polar alignment works for a long time, the polar order of the system increases greatly, thus the average alignment interaction magnitude significantly decreases.
